# Supplementary material
Source: HighWire-hosted journal article supplement (https://ard.bmj.com/content/76/7/1313)
Supplement: inline-supplementary-material-1 [file inline-supplementary-material-1.pdf]

## Supplementary figures and tables

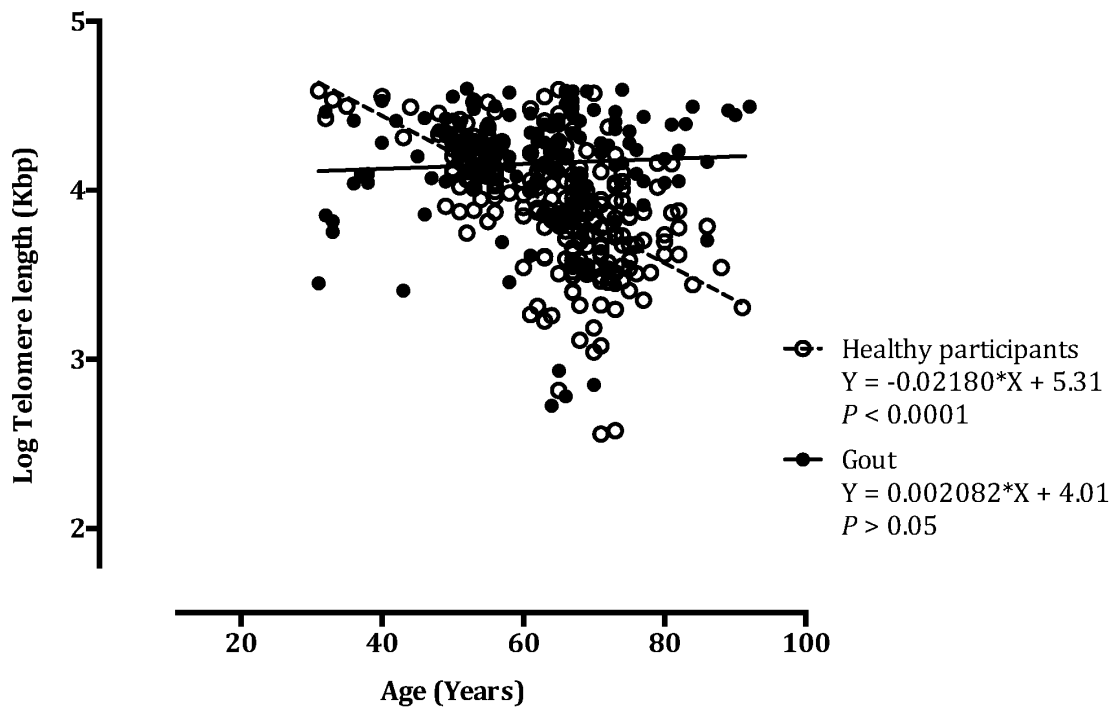

**Figure 1. Log transformed telomere length (kbp) of PBMCs of patients with gout and healthy individuals participating in Dutch cohort consistent with age (years).** Patients with gout (N=145) have shorter telomeres at young age and the TL remains short in older patients with gout ( $P > 0.05$ ). Young healthy participants (N=273) represent longer telomere as compared to older individuals ( $P < 0.0001$ ). Overall TL of patients with gout is significantly shorter as compared to healthy participants ( $P < 0.0001$ ). Statistical analysis between the two groups was performed using two tailed Student T-test (Mann-Whitney correction). Correlation between TL and age was tested through linear regression model.

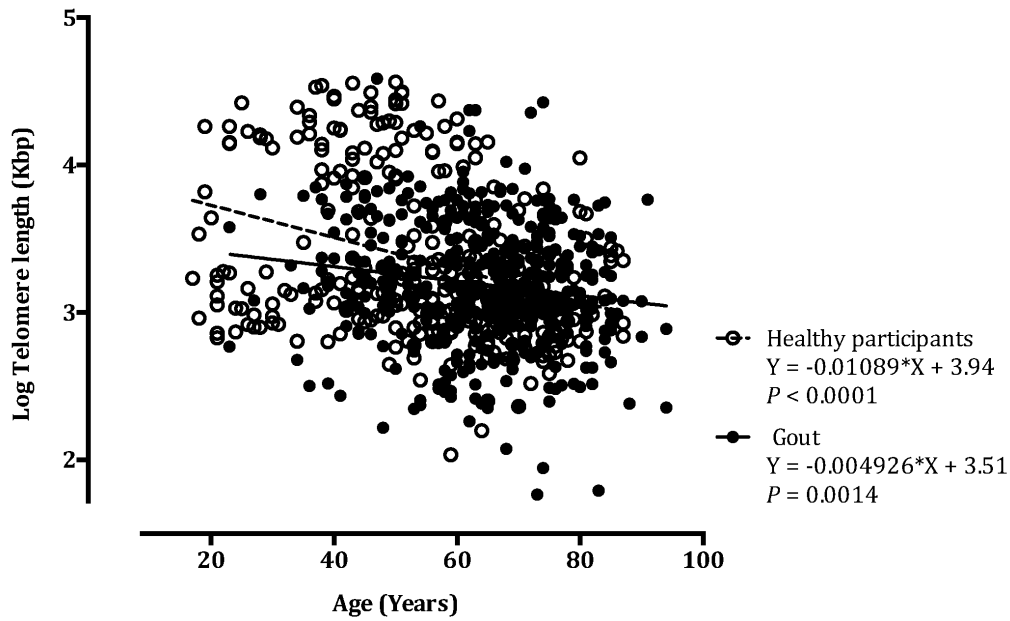

**Figure 2. Log transformed telomere length (kbp) of PBMCs of patients with gout and healthy individuals participating in New Zealand cohort consistent with age (years).** Patients with gout (N=474) have shorter telomeres at young age and the TL remains short in older patients with gout ( $P=0.001$ ). Young healthy participants (N=293) represent longer telomere as compared to older individuals ( $P<0.0001$ ). Overall TL of patients with gout is significantly shorter as compared to healthy participants ( $P<0.0001$ ). Statistical analysis between the two groups was performed using two tailed Student T-test (Mann-Whitney correction). Correlation between TL and age was tested through linear regression model.

**Supplementary files, table 1.** Baseline characteristics of patients with gout and healthy participants in the Dutch cohort.

|                              | Gout (n=145)       | Healthy participants (n=273) | <i>P</i> Value |
|------------------------------|--------------------|------------------------------|----------------|
| Male n (%)                   | 91 (62.76)         | 190 (69.70)                  | <i>0.0001</i>  |
| Age                          | 63 ± 9.85          | 62 ± 14.11                   | <i>0.0001</i>  |
| Telomere length (total PBMC) | 11215.33 ± 8042.54 | 18014.77 ± 9548.66           | <i>0.0001</i>  |

The data are presented as mean ± SD. The significance of the association between the 2 classified subgroups of patients with gout and healthy individuals was tested using Fisher's exact test (categorical values) and Mann-Whitney *U* test (non-parametrical continues values) (*P*<0.05).

**Supplementary files, table 2.** Baseline characteristics of patients with gout and healthy participants in the New Zealand cohort.

|                              | Gout (n=474)      | Healthy participants (n=293) | P Value |
|------------------------------|-------------------|------------------------------|---------|
| Male n (%)                   | 388 (81.86)       | 233 (85.35)                  | 0.0001  |
| Age                          | 64 ± 12.82        | 55 ± 16.59                   | 0.0001  |
| Telomere length (total PBMC) | 2524.55 ± 3478.42 | 5151.93 ± 7674.79            | 0.0001  |

The data are presented as mean ± SD. The significance of the association between the 2 classified subgroups of patients with gout and healthy individuals was tested using Fisher's exact test (categorical values) and Mann-Whitney *U* test (non-parametrical continues values) ( $P < 0.05$ ).

**Supplementary files, table 3.** Baseline characteristics of patients with gout and healthy participants in immune cell-subsets.

|                                                                    | Gout (n=10)         | Healthy participants (n=11) | <i>P Value</i> |
|--------------------------------------------------------------------|---------------------|-----------------------------|----------------|
| <b>Male n (%)</b>                                                  | 8 (80)              | 10 (91)                     | >0.05          |
| <b>Age (mean ± SD)</b>                                             | 59 ± 16.27          | 45 ± 12.88                  | >0.05          |
| <b>Age at the first flare (mean ± SD)</b>                          | 53 ± 5.76           | -                           | -              |
| <b>Disease duration (year) (mean ± SD)</b>                         | 5.70 ± 2.77         | -                           | -              |
| <b>Colchicine (yes) n (%)</b>                                      | 2 (20)              | N.A.                        | -              |
| <b>NSAID (yes) n (%)</b>                                           | 1 (10)              | N.A.                        | -              |
| <b>Allopurinol (yes) (mean 200mg/day) n (%)</b>                    | 3 (30)              | N.A.                        | -              |
| <b>Corticosteroids(yes) n (%)</b>                                  | 2 (20)              | N.A.                        | -              |
| <b>CVD (yes/no) n (%)</b>                                          | 6 (60)              | N.D.                        | -              |
| <b>Diabetes (type 2) (yes) n (%)</b>                               | 6 (60)              | N.D.                        | -              |
| <b>Hypertension (yes) n (%)</b>                                    | 4 (40)              | N.D.                        | -              |
| <b>Creatinine level (µmol/L) (mean ± SD)</b>                       | 109.00 (± 25.09)    | N.D.                        | -              |
| <b>BMI (kg/m<sup>2</sup>) mean (SD) (mean ± SD)</b>                | 32.58 (± 8.51)      | N.D.                        | -              |
| <b>Smoking (yes) n (%)</b>                                         | 1 (10.00)           | N.D.                        | -              |
| <b>Serum urate (mmol/L) mean (SD)</b>                              | 0.54 (±0.14)        | N.D.                        | -              |
| <b>Number of flares (mean ± SD)</b>                                | 19.70 ± 6.63        | N.A.                        | -              |
| <b>Presence of tophi (yes) n (%)</b>                               | 4 (40)              | N.A.                        | -              |
| <b>Systolic blood pressure mean (mm Hg) (SD)</b>                   | 121.00 (±21.81)     | N.D.                        | -              |
| <b>Diastolic blood pressure mean (mm Hg) (SD)</b>                  | 70.20 (±12.04)      | N.D.                        | -              |
| <b>Telomere length CD3<sup>+</sup>/CD4<sup>+</sup> (mean ± SD)</b> | 15247.68 ± 13956.01 | 7339.70 ± 5063.97           | >0.05          |

|                                                                        |                     |                    |       |
|------------------------------------------------------------------------|---------------------|--------------------|-------|
| <b>Telomere length CD3<sup>+</sup>/CD8<sup>+</sup> (mean ± SD)</b>     | 13036.82 ± 7838.27  | 6987.34 ± 5666.97  | >0.05 |
| <b>Telomere length CD19<sup>+</sup>/CD20<sup>-</sup> (mean ± SD)</b>   | 23374.06 ± 25676.88 | 8620.14 ± 6476.89  | >0.05 |
| <b>Telomere length CD14<sup>+</sup>/CD16<sup>-</sup> (mean ± SD)</b>   | 10988.64 ± 4523.27  | 6864.43 ± 5103.57  | >0.05 |
| <b>Telomere length CD3<sup>-</sup>/CD56<sup>+</sup> (mean ± SD)</b>    | 12599.09 ± 27954.54 | 5310.30 ± 1747.49  | >0.05 |
| <b>Telomere length CD123<sup>+</sup>/CD304<sup>+</sup> (mean ± SD)</b> | 2804.35 ± 2536.15   | 4052.95 ± 4776.86  | >0.05 |
| <b><i>hTERT</i> CD3<sup>+</sup>/CD4<sup>+</sup> (mean ± SD)</b>        | 0.00112 ± 0.000240  | 0.00068 ± 0.000130 | >0.05 |
| <b><i>hTERT</i> CD3<sup>+</sup>/CD8<sup>+</sup> (mean ± SD)</b>        | 0.00028 ± 0.000040  | 0.00036 ± 0.000100 | >0.05 |
| <b><i>hTERT</i> CD19<sup>+</sup>/CD20<sup>-</sup> (mean ± SD)</b>      | 0.00039 ± 0.000054  | 0.00139 ± 0.001120 | >0.05 |
| <b><i>hTERT</i> CD14<sup>+</sup>/CD16<sup>-</sup> (mean ± SD)</b>      | 0.00018 ± 0.000041  | 0.00004 ± 0.000020 | >0.05 |
| <b><i>hTERT</i> CD3<sup>-</sup>/CD56<sup>+</sup> (mean ± SD)</b>       | 0.00030 ± 0.000001  | 0.00012 ± 0.000080 | >0.05 |
| <b><i>hTERT</i> CD123<sup>+</sup>/CD304<sup>+</sup> (mean ± SD)</b>    | N.D.                | N.D.               | -     |

The data are presented as mean ± SD. The significance of the association between the 2 classified subgroups of patients with gout and healthy participants was tested using Fisher's exact test (categorical values) and Mann-Whitney *U* test (non-parametrical continues values) ( $P < 0.05$ ) (N.D.=not defined, N.A.=not applicable).

**Supplementary files, table 4.** Telomere length differences between gout participants with or without cardiovascular disease (A) and the association of cardiovascular disease with the flare frequency in the gout population (B).

|                        | <b>A) Telomere length (bp) in gout population with or without cardiovascular disease</b> |                            |                | <b>B) Multivariate linear regression on flare frequency and cardiovascular diseases in gout population</b> |                       |                |
|------------------------|------------------------------------------------------------------------------------------|----------------------------|----------------|------------------------------------------------------------------------------------------------------------|-----------------------|----------------|
|                        | <b>Yes (SD)</b>                                                                          | <b>No (SD)</b>             | <b>P Value</b> | <b>Standardized <math>\beta</math></b>                                                                     | <b>Standard error</b> | <b>P Value</b> |
| Cardiovascular disease | 2187<br>( $\pm$ 1934.10)                                                                 | 6154<br>( $\pm$ 8938.23)   | <i>0.0001</i>  | -1.35                                                                                                      | 1.82                  | <i>0.459</i>   |
| Angina pectoris        | 2223<br>( $\pm$ 2625.17)                                                                 | 5527<br>( $\pm$ 7805.88)   | <i>0.0001</i>  | -2.94                                                                                                      | 3.07                  | <i>0.340</i>   |
| Heart failure          | 4656<br>( $\pm$ 28288.80)                                                                | 13712<br>( $\pm$ 28141.32) | <i>0.015</i>   | -3.28                                                                                                      | 2.57                  | <i>0.203</i>   |
| Myocardial infarction  | 2165<br>( $\pm$ 2397.07)                                                                 | 7272<br>( $\pm$ 10916.47)  | <i>0.0001</i>  | -4.50                                                                                                      | 2.62                  | <i>0.063</i>   |
| Stroke                 | 82 ( $\pm$ 2378.78)                                                                      | 4784<br>( $\pm$ 8980.58)   | <i>0.0001</i>  | -3.32                                                                                                      | 2.83                  | <i>0.242</i>   |

Telomere length (SD) in patients with gout with cardiovascular disease, angina pectoris, heart failure, myocardial infarction (non-fatal) and stroke (non-fatal) as concomitant disorders. **A)** The significance of the association between the 2 classified subgroups of gout participants was tested using Mann–Whitney *U* test. **B)** The association between the same variables (cardiovascular comorbidities) and the flare frequency was tested in a multiple variable linear regression model ( $P < 0.05$ ).

**Supplementary files, table 5.** The effect of additional co-variables on telomere length of patients with gout and healthy participants separately.

|                     | <b>Gout</b>                                    |                | <b>Healthy participant</b>                     |                |
|---------------------|------------------------------------------------|----------------|------------------------------------------------|----------------|
|                     | <b>Correlation Coefficient (R<sup>2</sup>)</b> | <b>P value</b> | <b>Correlation Coefficient (R<sup>2</sup>)</b> | <b>P value</b> |
| Gender              | -0.023                                         | <i>0.574</i>   | 0.173                                          | <i>0.001</i>   |
| Age (years)         | -0.102                                         | <i>0.014</i>   | -0.315                                         | <i>0.0001</i>  |
| Smoking (yes/no)    | 0.418                                          | <i>0.0001</i>  | -0.041                                         | <i>0.669</i>   |
| BMI                 | 0.031                                          | <i>0.459</i>   | 0.080                                          | <i>0.175</i>   |
| Creatinine (μmol/L) | -0.205                                         | <i>0.0002</i>  | -0.203                                         | <i>0.001</i>   |

The statistical significance of the data is tested using two-tailed Spearman's bivariate correlation ( $P < 0.05$ ).
